# Supplementary material for: Effects of an Automated External Defibrillator With Additional Video Instructions on the Quality of Cardiopulmonary Resuscitation
Source: PubMed Central journal article supplement (PMC8009965; doi:10.3389/fmed.2021.640721), 2021-03-17
Supplement: Image_1.pdf [file Image_1.pdf]

ID:

test station:

## AED: Audio-Video vs. Audio

|                                                                                                              |                                                                                                                                                                                                                  |
|--------------------------------------------------------------------------------------------------------------|------------------------------------------------------------------------------------------------------------------------------------------------------------------------------------------------------------------|
| Sex:                                                                                                         | <input type="radio"/> m <input type="radio"/> w                                                                                                                                                                  |
| Weight (kg):                                                                                                 |                                                                                                                                                                                                                  |
| Height (cm):                                                                                                 |                                                                                                                                                                                                                  |
| BMI (to be filled in by the study staff):                                                                    |                                                                                                                                                                                                                  |
| Age:                                                                                                         |                                                                                                                                                                                                                  |
| Have you ever performed CPR in real life?                                                                    | <input type="radio"/> Yes, without AED<br><input type="radio"/> Yes, <b>with</b> AED<br><input type="radio"/> No                                                                                                 |
| Did you already attend a CPR training/first aid course?                                                      | <input type="radio"/> Yes, without using an AED<br><input type="radio"/> Yes, an <b>AED</b> was <b>used</b><br><input type="radio"/> No                                                                          |
| When was the last time you attended a CPR training/first aid course in which an <b>AED</b> was <b>used</b> ? | <input type="radio"/> never<br><input type="radio"/> within the last 6 months<br><input type="radio"/> 6 to 12 months ago<br><input type="radio"/> 12 to 24 ago<br><input type="radio"/> more than 24 months ago |
|                                                                                                              |                                                                                                                                                                                                                  |

Randomisation number **proband** (to be filled in by the study staff): \_\_\_\_\_

Audio-Video

Audio

ID:

test station:

## Chronological sequence of CPR

| min:sec                  | Event                                                                                                                                                                                                                                                                                                                                 |                |                    |                          |                          |
|--------------------------|---------------------------------------------------------------------------------------------------------------------------------------------------------------------------------------------------------------------------------------------------------------------------------------------------------------------------------------|----------------|--------------------|--------------------------|--------------------------|
| 00:00                    | Turning on the AED                                                                                                                                                                                                                                                                                                                    |                |                    |                          |                          |
|                          | Pad placement <table style="float: right; margin-left: 20px;"> <tr> <td style="text-align: center;"><b>correct</b></td> <td style="text-align: center;"><b>not correct</b></td> </tr> <tr> <td style="text-align: center;"><input type="checkbox"/></td> <td style="text-align: center;"><input type="checkbox"/></td> </tr> </table> | <b>correct</b> | <b>not correct</b> | <input type="checkbox"/> | <input type="checkbox"/> |
| <b>correct</b>           | <b>not correct</b>                                                                                                                                                                                                                                                                                                                    |                |                    |                          |                          |
| <input type="checkbox"/> | <input type="checkbox"/>                                                                                                                                                                                                                                                                                                              |                |                    |                          |                          |
|                          | 1. Shock                                                                                                                                                                                                                                                                                                                              |                |                    |                          |                          |
|                          | Start chest compressions                                                                                                                                                                                                                                                                                                              |                |                    |                          |                          |
|                          | Stop chest compressions                                                                                                                                                                                                                                                                                                               |                |                    |                          |                          |
|                          | 2. Shock                                                                                                                                                                                                                                                                                                                              |                |                    |                          |                          |
|                          | Start chest compressions                                                                                                                                                                                                                                                                                                              |                |                    |                          |                          |
|                          | Finish                                                                                                                                                                                                                                                                                                                                |                |                    |                          |                          |

ID:

test station:

## Subjective evaluation

### Question 1

How simple/challenging was performing CPR using an Automated External Defibrillator from your point of view?

|                  |   |   |   |   |               |   |   |   |    |
|------------------|---|---|---|---|---------------|---|---|---|----|
| 1                | 2 | 3 | 4 | 5 | 6             | 7 | 8 | 9 | 10 |
| Highly demanding |   |   |   |   | fairly simple |   |   |   |    |

### Question 2

How intelligible were the Automated External Defibrillator's instructions during the course of performing CPR?

|                  |   |   |   |   |                     |   |   |   |    |
|------------------|---|---|---|---|---------------------|---|---|---|----|
| 1                | 2 | 3 | 4 | 5 | 6                   | 7 | 8 | 9 | 10 |
| incomprehensible |   |   |   |   | highly intelligible |   |   |   |    |

### Question 3

To which degree were the Automated External Defibrillator's instructions supporting you during the course of performing CPR?

|            |   |   |   |   |                   |   |   |   |    |
|------------|---|---|---|---|-------------------|---|---|---|----|
| 1          | 2 | 3 | 4 | 5 | 6                 | 7 | 8 | 9 | 10 |
| Too little |   |   |   |   | highly supportive |   |   |   |    |

### Question 4

How would you rate the quality of your chest compressions with respect to effectiveness?

|            |   |   |   |   |           |   |   |   |    |
|------------|---|---|---|---|-----------|---|---|---|----|
| 1          | 2 | 3 | 4 | 5 | 6         | 7 | 8 | 9 | 10 |
| Rather bad |   |   |   |   | very good |   |   |   |    |

### Question 5

How challenging was the resuscitation process for you?

|            |   |   |   |   |              |   |   |   |    |
|------------|---|---|---|---|--------------|---|---|---|----|
| 1          | 2 | 3 | 4 | 5 | 6            | 7 | 8 | 9 | 10 |
| Not at all |   |   |   |   | To a maximum |   |   |   |    |

If there were **video-instructions** available, please answer the following questions as well:

### Question 6

How much attention did you pay to the video instructions?

|                     |   |   |   |   |                    |   |   |   |    |
|---------------------|---|---|---|---|--------------------|---|---|---|----|
| 1                   | 2 | 3 | 4 | 5 | 6                  | 7 | 8 | 9 | 10 |
| No attention at all |   |   |   |   | a lot of attention |   |   |   |    |

### Question 7

Was the video supportive concerning your emergency efforts?

Yes

No

## Thank you for participating – your study staff
